# Supplementary material for: A reduced vernalization requirement is a key component of the early-bolting trait in globe artichoke (Cynara cardunculus var. scolymus)
Source: PubMed Central journal article supplement — iScience. 2024 Aug 27;27(9):110829. doi: 10.1016/j.isci.2024.110829 (PMC11409005; doi:10.1016/j.isci.2024.110829), 2024-08-27
Supplement: mmc1.pdf [file mmc1.pdf]

**Supplemental information**

**A reduced vernalization requirement is a key component of the early-bolting trait in globe artichoke (*Cynara cardunculus* var. *scolymus*)**

**Rick Berentsen, Reyes Benlloch, Peter Visser, Francisco Madueño, and Vicente Balanzà**

1 Supplementary Figures

2

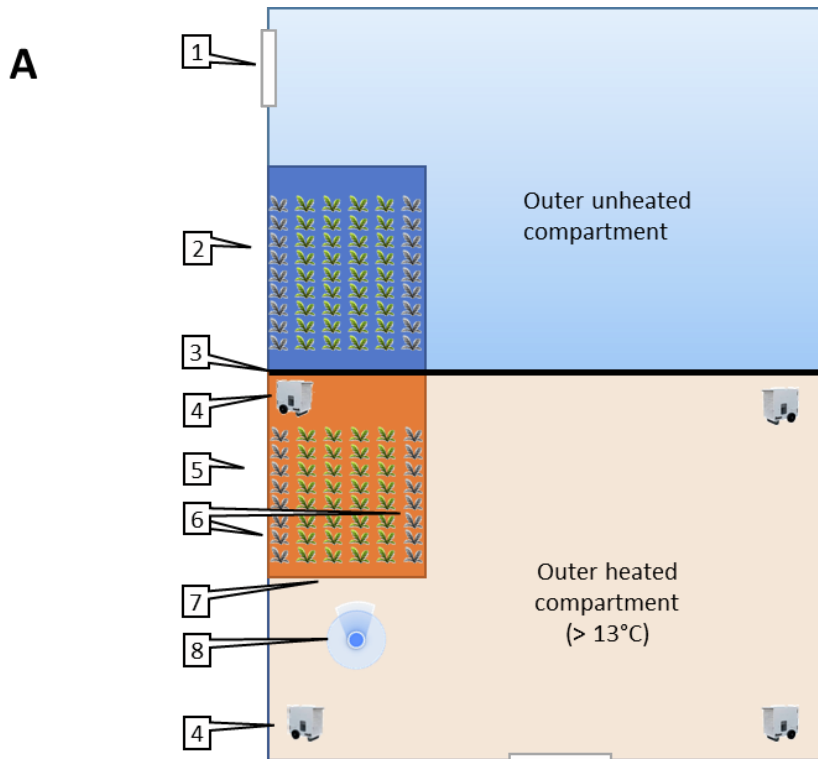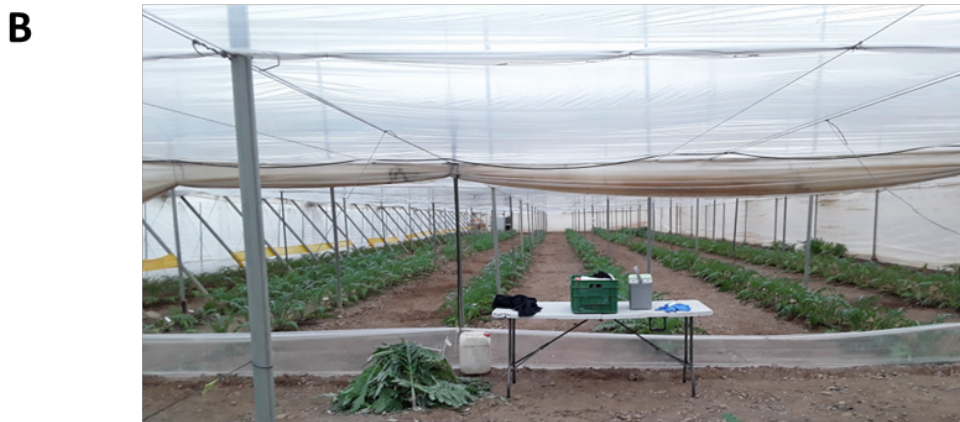

3

4 **Supplementary Figure S1: Schematic representation and photographic illustration of experimental**  
 5 **conditions. Related to STAR METHODS (Experimental design and treatment).** A. Schematic  
 6 representation of the experiment. 1 = access door in outer wall, 2 = cold compartment (vernalization /  
 7 control) (blue fill), 3 = double wall separating heated and non-heated sectors, 4 = heater, 5 = heated  
 8 compartment (red fill), 6 = border rows (grey), 7 = inner compartment wall, 8 = viewpoint for the  
 9 photograph below. B. Photograph of the heated compartment from the viewpoint indicated by marker  
 10 (8). The inner compartment wall facing the camera has been raised while the lateral inner wall and outer  
 11 wall are still lowered for comparison. In the back of the image is the double wall separating the sectors,  
 12 behind which is the cold compartment. Yellow bands along the outer wall serve as pest control. The table  
 13 and tools illustrate the scale of the image.

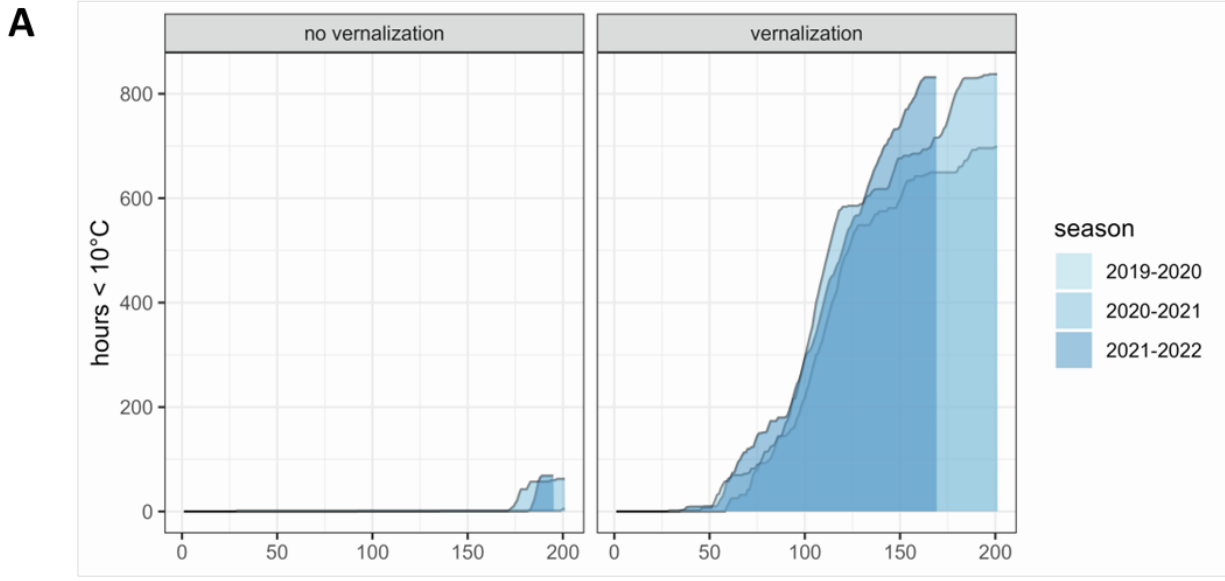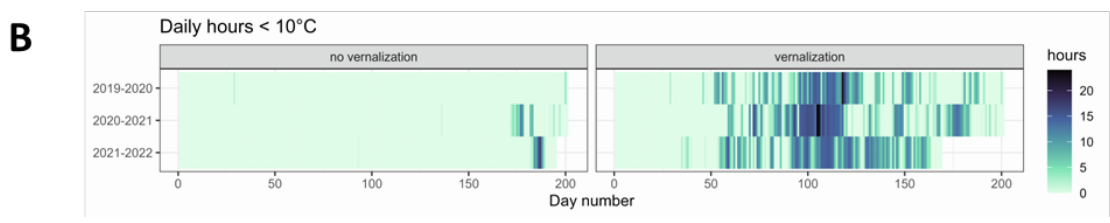

14

15 **Supplementary Figure S2: Accumulation and distribution of hours < 10°C. Related to Figure 2. A**

16 Accumulated numbers of hours < 10°C for each season in the no-vernalization and vernalization

17 compartments. **B** Number of hours < 10°C for each individual day. Data from three seasons.

**A**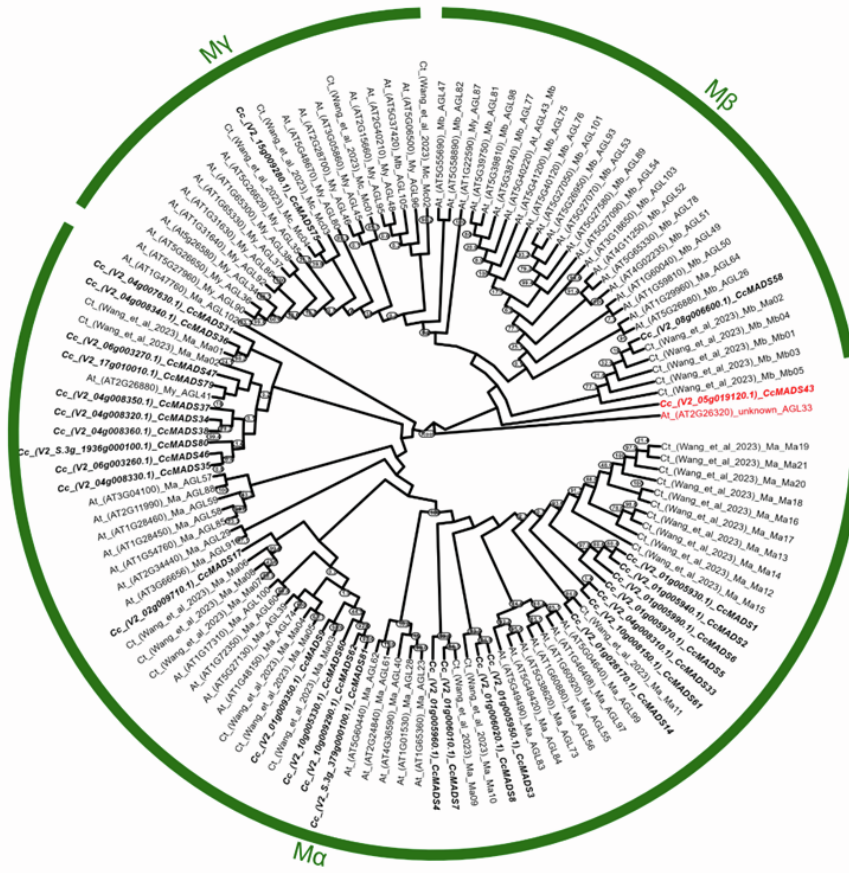**B**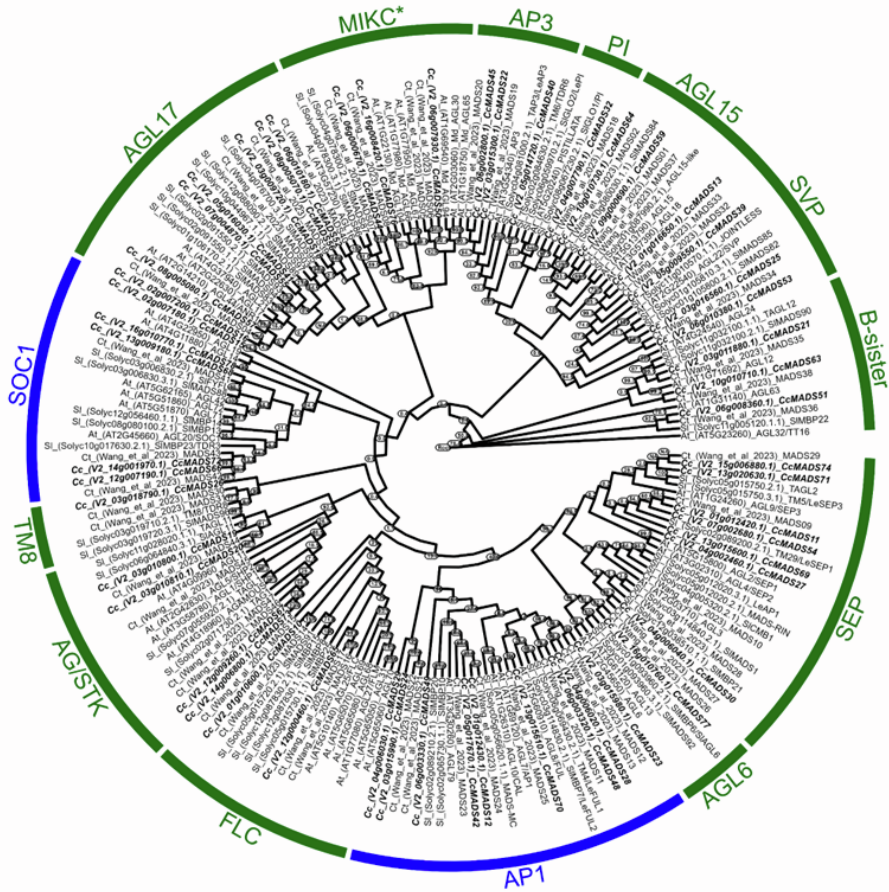

19 **Supplementary Figure S3: ML cladograms of Type I and Type II MADS box genes. Related to STAR**  
20 **METHODS (Identification of MADS box genes in globe artichoke).** **A** Type I MADS box genes from  
21 globe artichoke and Arabidopsis. Red tip names indicate ungrouped genes. **B** Type II MADS box genes  
22 from globe artichoke (Cc), Arabidopsis (At), tomato (Sl) and safflower (Ct). Green strips annotate  
23 subclades for both Type I and Type II cladograms, with the AP1 and SOC1 subclades highlighted in  
24 blue.

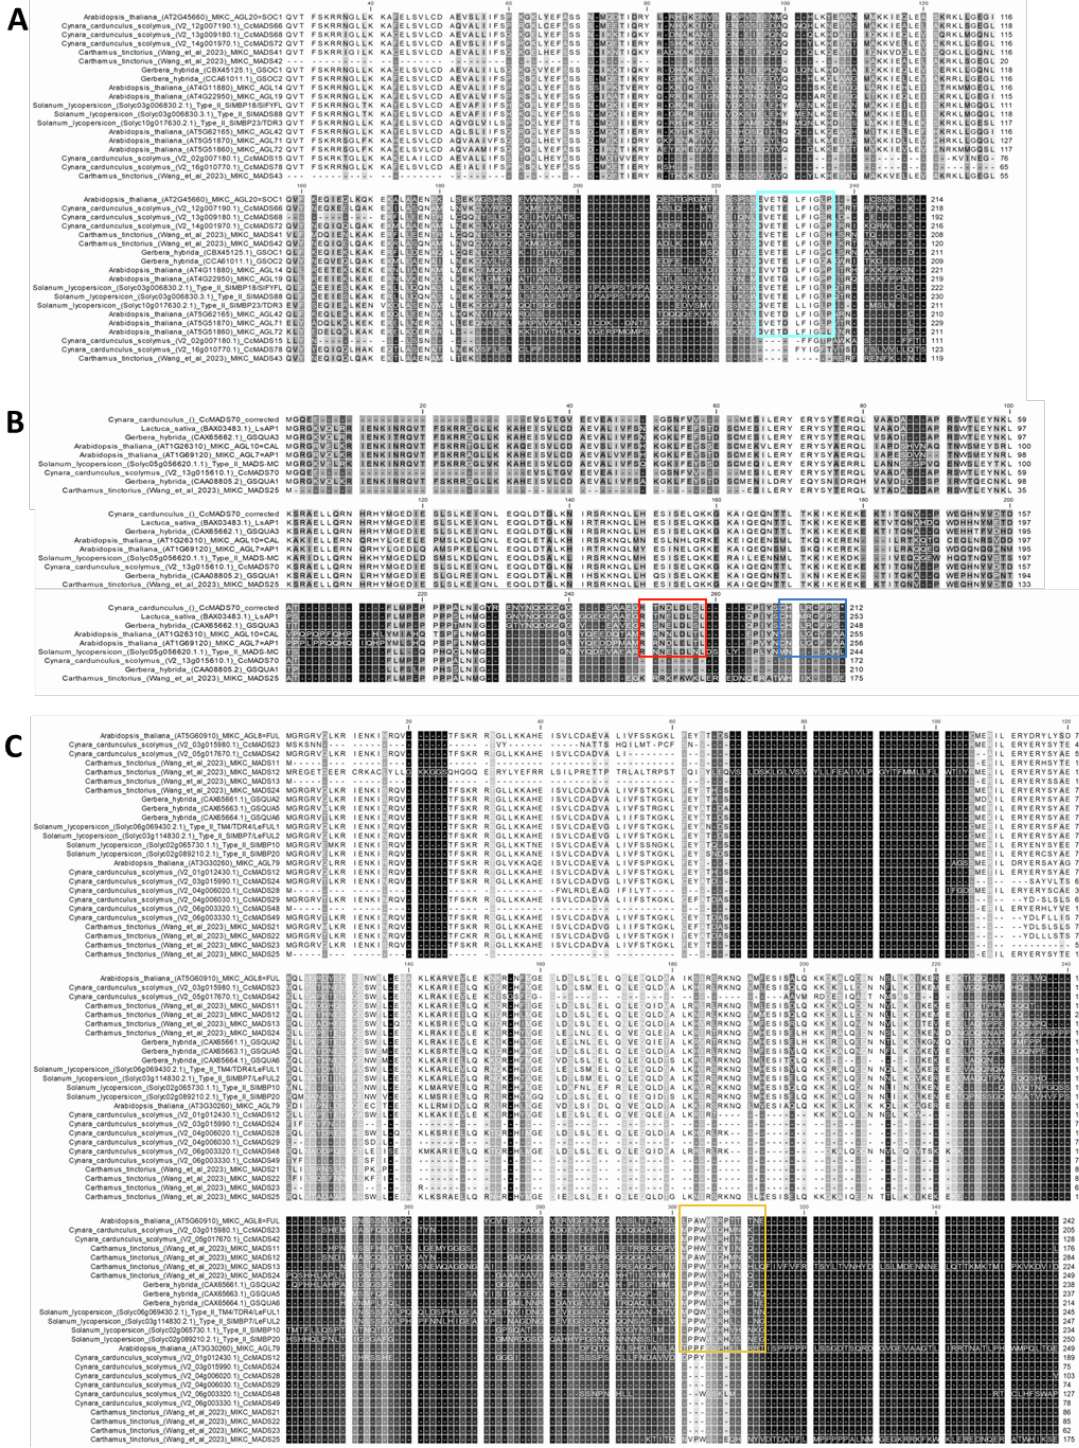

25  
 26 **Supplementary Figure S4: Protein sequence alignments for SOC1, AP1 and FUL subfamilies. Related**  
 27 **to Figure 4. Genes used in the phylogenetic study. A** SOC1 subfamily, TM3/SOC1 motifs marked with a  
 28 cyan box. **B** AP1 subfamily. Red box denotes the euAP1 acidic domain and the blue box the farnesylation  
 29 motif. **C** FUL subfamily. The euFUL/paleoAP1 domain is marked by a yellow box.

30 **Supplementary tables**

31 **Supplementary Table S1: Comparison between phenological stages around the time of floral transition**  
 32 **and the stages added to describe morphological changes. Related to Figure 1. Grey fill accentuates**  
 33 **the positioning of the added bolting stages in relation to the existing scales.**

| phenological stages according to BBCH scale<br>(Archontoulis et al., 2009)       | phenological stages according to (Foury, 1967) and<br>(Pesce and Mauromicale, 2019) (modified) |                                                                       | phenological stages added to describe morphological changes at the<br>microscopic level |                                                                                                                                   |
|----------------------------------------------------------------------------------|------------------------------------------------------------------------------------------------|-----------------------------------------------------------------------|-----------------------------------------------------------------------------------------|-----------------------------------------------------------------------------------------------------------------------------------|
| stage                                                                            | stage                                                                                          | description                                                           | developmental stage                                                                     | description                                                                                                                       |
| Principal growth stage 4: development of vegetative plant parts (Codes 41-49)    | bolting stage 0                                                                                | No signs of bolting on macroscopic scale (if no dissection of apex)   | pre-bolting stage 0                                                                     | Apex round, later flat at dissection.                                                                                             |
|                                                                                  | bolting stage R                                                                                | caulinar apex in transition from the vegetative to reproductive phase | pre-bolting stage 1                                                                     | Apex assuming a pointed shape at dissection.                                                                                      |
| Principal growth stage 5: inflorescence emergence and development, code 501      | bolting stage A                                                                                | Primary inflorescence perceptible by palpation                        | pre-bolting stage 2                                                                     | Primordial primary head visible to the naked eye at dissection of apex                                                            |
| Principal growth stage 5: inflorescence emergence and development, code 501      | bolting stage B                                                                                | Top of primary inflorescence visible in center of the rosette         | pre-bolting stage 3                                                                     | Primary head developing, height $\pm 1$ cm at dissection of apex.                                                                 |
| Principal growth stage 5: inflorescence emergence and development, codes 501-503 | bolting stage C                                                                                | Primary inflorescence more than 10 cm above center of rosette.        | pre-bolting stage 4                                                                     | Primary head fully developed, secondary primordial heads visible to naked eye at dissection. First inflorescence stem elongation. |

34



35 Supplementary Table S2: Environmental data calculated and collected during the experiments.  
 36 Related to Table 1.

| season    | treatment        | n_days | daily mean (°C) |      |      | accumulated     |
|-----------|------------------|--------|-----------------|------|------|-----------------|
|           |                  |        | min             | mean | max  | hours<br>< 10°C |
| 2019-2020 | no vernalization | 201    | 19.1            | 14.4 | 28.3 | 5               |
| 2020-2021 | no vernalization | 201    | 18.1            | 13.4 | 27.4 | 62              |
| 2021-2022 | no vernalization | 195    | 17.6            | 13.6 | 26.2 | 69              |
| 2019-2020 | vernalization    | 201    | 16.7            | 10.6 | 27.5 | 698             |
| 2020-2021 | vernalization    | 201    | 16.1            | 9.9  | 26.8 | 837             |
| 2021-2022 | vernalization    | 169    | 15.8            | 9.9  | 27.5 | 832             |

37

38

39 **Supplementary Table S3: Wald tests for non-zero predictors. Related to Figure 2.** Wald tests for models  
 40 per genotype (genotypes c1, c70, c20, and c154) and per category (early-bolting genotypes c1 and c70  
 41 vs late-bolting genotypes c20 and c154).

42

| <b>model<sup>a</sup></b> | <b>source</b>       | <b>Df<sup>b</sup></b> | <b>denDF<sup>c</sup></b> | <b>F.inc<sup>d</sup></b> | <b>Pr<sup>e</sup></b> |
|--------------------------|---------------------|-----------------------|--------------------------|--------------------------|-----------------------|
| <b>per genotype</b>      | (Intercept)         | 1                     | 100.6                    | 94810                    | 1.85E-151             |
|                          | genotype            | 6                     | 107.3                    | 615.1                    | 1.16E-80              |
|                          | treatment           | 1                     | 99.8                     | 271.8                    | 3.01E-30              |
|                          | season              | 2                     | 51.6                     | 1.537                    | 2.25E-01              |
|                          | genotype:treatment  | 6                     | 106.8                    | 6.383                    | 9.09E-06              |
|                          | season:treatment    | 2                     | 52.5                     | 7.253                    | 1.66E-03              |
|                          | <b>per category</b> | (Intercept)           | 1                        | 154.7                    | 24030                 |
| earliness                |                     | 1                     | 147.7                    | 718.6                    | 1.29E-58              |
| treatment                |                     | 1                     | 154.6                    | 48.21                    | 9.95E-11              |
| season                   |                     | 2                     | 74.2                     | 0.3074                   | 7.36E-01              |
| earliness:treatment      |                     | 1                     | 146.9                    | 14.47                    | 2.08E-04              |
| treatment:season         |                     | 2                     | 74.1                     | 6.669                    | 2.17E-03              |

43

44 <sup>a</sup> Model used: "per genotype", each genotype, "per category", early-bolting vs late-bolting genotypes

45 <sup>b</sup> Df: Degrees of freedom

46 <sup>c</sup> denDF: denominator degrees of freedom

47 <sup>d</sup> F.inc: F-statistic value

48 <sup>e</sup> Pr = p-value

49

50 Supplementary Table S4: MADS box genes from globe artichoke. Related to STAR METHODS  
 51 (Identification of MADS box genes in globe artichoke).

| Name               | Gene         | GeneID                   | Length (a.a) | Domains            | Genomic position         | CDS length | Exons | Group               | Classification |               |
|--------------------|--------------|--------------------------|--------------|--------------------|--------------------------|------------|-------|---------------------|----------------|---------------|
|                    |              |                          |              |                    |                          |            |       |                     | Subfamily      |               |
| CcMADS1            |              | V2_01g005930.1           | 682          | SRF, SRF, SRF, SRF | Chr_01:6563154-6579934   | 2049       | 4     | Ma                  | -              | -             |
| CcMADS2            |              | V2_01g005940.1           | 755          | SRF, SRF           | Chr_01:6592245-6612897   | 2268       | 13    | Ma                  | -              | -             |
| CcMADS3            |              | V2_01g005950.1           | 470          | SRF, SRF           | Chr_01:6636827-6645096   | 1413       | 5     | Ma                  | -              | -             |
| CcMADS4            |              | V2_01g005960.1           | 184          | SRF                | Chr_01:6643236-6644793   | 555        | 4     | Ma                  | -              | -             |
| CcMADS5            |              | V2_01g005970.1           | 196          | SRF                | Chr_01:6645121-6645711   | 591        | 1     | Ma                  | -              | -             |
| CcMADS6            |              | V2_01g005990.1           | 89           | SRF                | Chr_01:6659102-6659371   | 270        | 1     | Ma                  | -              | -             |
| CcMADS7            |              | V2_01g006010.1           | 219          | SRF                | Chr_01:6672187-6672849   | 663        | 1     | Ma                  | -              | -             |
| CcMADS8            |              | V2_01g006020.1           | 267          | SRF                | Chr_01:6673382-6674418   | 804        | 2     | Ma                  | -              | -             |
| CcMADS9            |              | V2_01g009350.1           | 233          | SRF                | Chr_01:10447026-10447727 | 702        | 1     | Ma                  | -              | -             |
| CcMADS10           |              | V2_01g010600.1           | 126          | SRF                | Chr_01:11863297-11864466 | 381        | 2     | MIKC <sup>G</sup>   | -              | FLC           |
| CcMADS11           |              | V2_01g012420.1           | 190          | SRF, K-box         | Chr_01:13776558-13782784 | 573        | 5     | MIKC <sup>G</sup>   | -              | SEP           |
| CcMADS12           |              | V2_01g012430.1           | 189          | SRF, K-box         | Chr_01:13817078-13825390 | 570        | 6     | MIKC <sup>G</sup>   | -              | AP1           |
| CcMADS13           |              | V2_01g016650.1           | 171          | SRF                | Chr_01:19062272-19066258 | 516        | 5     | MIKC <sup>G</sup>   | -              | SVP           |
| CcMADS14           |              | V2_01g026170.1           | 199          | SRF                | Chr_01:49764431-49765030 | 600        | 1     | Ma                  | -              | -             |
| CcMADS15           | CcSOC1Like-C | V2_02g007180.1           | 111          | SRF                | Chr_02:8995755-9004272   | 344        | 2     | MIKC <sup>G</sup>   | -              | SOC1          |
| CcMADS16           |              | V2_02g007200.1           | 198          | SRF, K-box         | Chr_02:9035643-9049722   | 597        | 6     | MIKC <sup>G</sup>   | -              | AGL17         |
| CcMADS17           |              | V2_02g009710.1           | 127          | SRF                | Chr_02:14659672-14660193 | 384        | 2     | Ma                  | -              | -             |
| CcMADS18           |              | V2_03g009720.1           | 170          | K-box              | Chr_03:17696857-17702624 | 515        | 6     | MIKC,SRF incomplete | -              | AGL17         |
| CcMADS19           |              | V2_03g010800.1           | 239          | K-box              | Chr_03:32010378-32016725 | 720        | 6     | MIKC,SRF incomplete | -              | AG/STK        |
| CcMADS20           |              | V2_03g010810.1           | 78           | SRF                | Chr_03:32026348-32027307 | 237        | 2     | MIKC <sup>G</sup>   | -              | AG/STK        |
| CcMADS21           |              | V2_03g011880.1           | 176          | SRF                | Chr_03:46733984-46739542 | 531        | 6     | MIKC <sup>G</sup>   | -              | B-sister      |
| CcMADS22           |              | V2_03g015300.1           | 229          | SRF, K-box         | Chr_03:59976194-59980703 | 690        | 7     | MIKC <sup>G</sup>   | -              | AP3 (DEF/GLO) |
| CcMADS23           | CcFULLike-B  | V2_03g015980.1           | 205          | K-box              | Chr_03:61174353-61180637 | 816        | 9     | MIKC,SRF incomplete | -              | AP1           |
| CcMADS24           |              | V2_03g015990.1           | 75           | SRF                | Chr_03:61198079-61198306 | 228        | 1     | MIKC <sup>G</sup>   | -              | AP1           |
| CcMADS25           |              | V2_03g016560.1           | 252          | SRF, K-box         | Chr_03:61999323-62016372 | 759        | 11    | MIKC <sup>G</sup>   | -              | SVP           |
| CcMADS26           |              | V2_03g018790.1           | 115          | K-box              | Chr_03:64996337-64997256 | 348        | 5     | MIKC,SRF incomplete | -              | TM8           |
| CcMADS27           |              | V2_04g002460.1           | 107          | SRF                | Chr_04:2743621-2750447   | 658        | 7     | MIKC <sup>G</sup>   | -              | SEP           |
| CcMADS28           |              | V2_04g006020.1           | 103          | K-box              | Chr_04:7740034-7740917   | 312        | 3     | MIKC,SRF incomplete | -              | AP1           |
| CcMADS29           |              | V2_04g006030.1           | 74           | SRF                | Chr_04:7758582-7758806   | 225        | 1     | MIKC <sup>G</sup>   | -              | AP1           |
| CcMADS30           |              | V2_04g006040.1           | 248          | SRF, K-box         | Chr_04:7777716-7780938   | 765        | 8     | MIKC <sup>G</sup>   | -              | SEP           |
| CcMADS31           |              | V2_04g007630.1           | 193          | SRF                | Chr_04:10649060-10649641 | 582        | 1     | Ma                  | -              | -             |
| CcMADS32           |              | V2_04g007790.1           | 170          | SRF, K-box         | Chr_04:11094347-11095508 | 513        | 4     | MIKC <sup>G</sup>   | -              | PI (DEF/GLO)  |
| CcMADS33           |              | V2_04g008310.1           | 357          | SRF                | Chr_04:12663996-12673567 | 1321       | 6     | Ma                  | -              | -             |
| CcMADS34           |              | V2_04g008320.1           | 292          | SRF                | Chr_04:12664285-12671674 | 879        | 4     | Ma                  | -              | -             |
| CcMADS35           |              | V2_04g008330.1           | 607          | SRF                | Chr_04:12700422-12716552 | 1824       | 6     | Ma                  | -              | -             |
| CcMADS36           |              | V2_04g008340.1           | 193          | SRF                | Chr_04:12717490-12718071 | 582        | 1     | Ma                  | -              | -             |
| CcMADS37           |              | V2_04g008350.1           | 313          | SRF                | Chr_04:12736542-12748071 | 942        | 3     | Ma                  | -              | -             |
| CcMADS38           |              | V2_04g008360.1           | 120          | SRF                | Chr_04:12745559-12746192 | 634        | 1     | Ma                  | -              | -             |
| CcMADS39           |              | V2_05g009550.1           | 220          | SRF, K-box         | Chr_05:16157678-16162664 | 663        | 7     | MIKC <sup>G</sup>   | -              | SVP           |
| CcMADS40           |              | V2_05g014720.1           | 139          | SRF                | Chr_05:56612198-56616210 | 420        | 3     | MIKC <sup>G</sup>   | -              | AP3 (DEF/GLO) |
| CcMADS41           | CcFULLike-A  | V2_05g016030.1           | 137          | SRF, K-box         | Chr_05:58719144-58728679 | 414        | 5     | MIKC <sup>G</sup>   | -              | AGL17         |
| CcMADS42           |              | V2_05g017670.1           | 128          | SRF                | Chr_05:61226372-61236507 | 387        | 4     | MIKC <sup>G</sup>   | -              | AP1           |
| CcMADS43           |              | V2_05g019120.1           | 437          | SRF                | Chr_05:63006208-63007521 | 1314       | 1     | Mβ                  | -              | -             |
| CcMADS44           |              | V2_06g000670.1           | 200          | SRF                | Chr_06:2542888-2546558   | 603        | 6     | MIKC* / Mδ          | -              | MIKC*         |
| CcMADS45           |              | V2_06g002800.1           | 232          | SRF, K-box         | Chr_06:10366962-10371671 | 699        | 7     | MIKC <sup>G</sup>   | -              | AP3 (DEF/GLO) |
| CcMADS46           |              | V2_06g003260.1           | 241          | SRF                | Chr_06:11217724-11221447 | 726        | 2     | Ma                  | -              | -             |
| CcMADS47           |              | V2_06g003270.1           | 106          | SRF                | Chr_06:11221157-11221776 | 620        | 1     | Ma                  | -              | -             |
| CcMADS48           |              | V2_06g003320.1           | 127          | K-box              | Chr_06:11289297-11291933 | 384        | 5     | MIKC,SRF incomplete | -              | AP1           |
| CcMADS49           |              | V2_06g003330.1           | 78           | SRF                | Chr_06:11303009-11303245 | 237        | 1     | MIKC <sup>G</sup>   | -              | AP1           |
| CcMADS50           |              | V2_06g007930.1           | 365          | SRF                | Chr_06:17105260-17109803 | 1098       | 10    | MIKC* / Mδ          | -              | MIKC*         |
| CcMADS51           |              | V2_06g008360.1           | 325          | SRF, K-box         | Chr_06:18606119-18608510 | 1036       | 7     | MIKC <sup>G</sup>   | -              | B-sister      |
| CcMADS52           |              | V2_06g010180.1           | 453          | SRF, K-box         | Chr_06:23081934-23106721 | 1370       | 14    | MIKC <sup>G</sup>   | -              | AGL17         |
| CcMADS53           |              | V2_06g010380.1           | 174          | SRF, K-box         | Chr_06:23474053-23479848 | 525        | 3     | MIKC <sup>G</sup>   | -              | SVP           |
| CcMADS54           |              | V2_07g002680.1           | 142          | SRF, K-box         | Chr_07:2665138-2669869   | 429        | 4     | MIKC <sup>G</sup>   | -              | SEP           |
| CcMADS55           |              | V2_07g004870.1           | 123          | SRF                | Chr_07:5959657-5962387   | 372        | 3     | MIKC <sup>G</sup>   | -              | AGL17         |
| CcMADS56           |              | V2_08g005070.1           | 93           | SRF                | Chr_08:6179130-6180671   | 282        | 2     | MIKC <sup>G</sup>   | -              | AGL17         |
| CcMADS57           |              | V2_08g005080.1           | 191          | K-box              | Chr_08:6193002-6199425   | 576        | 7     | MIKC <sup>G</sup>   | -              | AGL17         |
| CcMADS58           |              | V2_08g006600.1           | 333          | SRF                | Chr_08:8157232-8158233   | 1002       | 1     | My                  | -              | -             |
| CcMADS59           |              | V2_09g000690.1           | 234          | SRF, K-box         | Chr_09:1966147-1970271   | 705        | 6     | MIKC <sup>G</sup>   | -              | AGL15         |
| CcMADS60           |              | V2_10g005330.1           | 236          | SRF                | Chr_10:5839834-5840544   | 711        | 1     | Ma                  | -              | -             |
| CcMADS61           |              | V2_10g008150.1           | 241          | SRF, SRF           | Chr_10:9337223-9338186   | 792        | 2     | Ma                  | -              | -             |
| CcMADS62           |              | V2_10g009290.1           | 232          | SRF                | Chr_10:11534672-11535370 | 699        | 1     | Ma                  | -              | -             |
| CcMADS63           |              | V2_10g010710.1           | 156          | SRF                | Chr_10:14465025-14466948 | 471        | 5     | MIKC <sup>G</sup>   | -              | B-sister      |
| CcMADS64           |              | V2_10g010730.1           | 198          | SRF, K-box         | Chr_10:14543135-14547905 | 597        | 6     | MIKC <sup>G</sup>   | -              | AGL15         |
| CcMADS65           |              | V2_12g000460.1           | 318          | SRF                | Chr_12:433937-449367     | 957        | 10    | MIKC <sup>G</sup>   | -              | FLC           |
| CcMADS66           | CcSOC1b      | V2_12g007190.1           | 218          | SRF, K-box         | Chr_12:9071115-9075949   | 657        | 7     | MIKC <sup>G</sup>   | -              | SOC1          |
| CcMADS67           |              | V2_12g009260.1           | 211          | SRF, K-box         | Chr_12:12648980-12655523 | 692        | 6     | MIKC <sup>G</sup>   | -              | AG/STK        |
| CcMADS68           | CcSOC1Like-B | V2_13g009180.1           | 192          | SRF, K-box         | Chr_13:28823008-28829911 | 579        | 6     | MIKC <sup>G</sup>   | -              | SOC1          |
| CcMADS69           |              | V2_13g015600.1           | 137          | SRF                | Chr_13:38196053-38199798 | 414        | 3     | MIKC <sup>G</sup>   | -              | SEP           |
| CcMADS70           | (CcAP1)      | V2_13g015610.1           | 172          | K-box              | Chr_13:38268961-38273174 | 519        | 7     | MIKC,SRF incomplete | -              | AP1           |
| CcMADS70_corrected | CcAP1        | -                        | 211          | K-box              | Chr_13:38268961-38273724 | 636        | 8     | MIKC,SRF incomplete | -              | AP1           |
| CcMADS71           |              | V2_13g020630.1           | 215          | SRF, K-box         | Chr_13:44604397-44610355 | 648        | 7     | MIKC <sup>G</sup>   | -              | SEP           |
| CcMADS72           | CcSOC1a      | V2_14g001970.1           | 216          | SRF, K-box         | Chr_14:2757551-2762802   | 666        | 7     | MIKC <sup>G</sup>   | -              | SOC1          |
| CcMADS73           |              | V2_14g006800.1           | 192          | SRF, K-box         | Chr_14:23531833-23539409 | 579        | 4     | MIKC <sup>G</sup>   | -              | AG/STK        |
| CcMADS74           |              | V2_15g006880.1           | 227          | SRF, K-box         | Chr_15:7887245-7897105   | 704        | 6     | MIKC <sup>G</sup>   | -              | SEP           |
| CcMADS75           |              | V2_15g009280.1           | 249          | SRF                | Chr_15:10879232-10879981 | 750        | 1     | My                  | -              | -             |
| CcMADS76           |              | V2_16g008420.1           | 203          | SRF                | Chr_16:22853005-22856757 | 612        | 6     | MIKC* / Mδ          | -              | MIKC*         |
| CcMADS77           |              | V2_16g010760.1           | 156          | K-box              | Chr_16:28395469-28404407 | 471        | 7     | MIKC <sup>G</sup>   | -              | AGL6          |
| CcMADS78           | CcSOC1Like-A | V2_16g010770.1           | 123          | SRF                | Chr_16:28415914-28421188 | 372        | 4     | MIKC <sup>G</sup>   | -              | SOC1          |
| CcMADS79           |              | V2_17g010010.1           | 254          | K-box              | Chr_17:31971253-31978191 | 762        | 3     | MIKC <sup>G</sup>   | -              | -             |
| CcMADS80           |              | V2_ScYrq3g_1936g000100.1 | 190          | SRF                | ScYrq3g_1936:2832-3401   | 570        | 1     | Ma                  | -              | -             |
| CcMADS81           |              | V2_ScYrq3g_379g000100.1  | 232          | SRF                | ScYrq3g_379:2561-3259    | 699        | 1     | Ma                  | -              | -             |

52

53

54 Supplementary Table S5: Primers developed. Related to Figure 5.

55

| Primer name | Sequence                      | F/R | Target           | Fragment length (bp) <sup>a</sup> |
|-------------|-------------------------------|-----|------------------|-----------------------------------|
| ORB_7       | TCCCAGGCTGATTGTGCTGTCCTTATTAT | F   | CcElf1 $\alpha$  | 90                                |
| ORB_8       | ATGCTCACGGGTCTGACCATCCTTA     | R   | CcElf1 $\alpha$  | 90                                |
| ORB_57      | TGGAAGAAGGTCGAGCAAGT          | F   | CcSOC1A          | 98                                |
| ORB_58      | CCTGGTCCGTTTTTCGGGTA          | R   | CcSOC1A          | 98                                |
| ORB_59      | TGTTGAGCCCGAAAGATGC           | F   | CcSOC1B          | 120                               |
| ORB_60      | TGGTCCGTTTGGACTAGGCA          | R   | CcSOC1B          | 120                               |
| ORB_105     | CTTGAACCTGCCTCGGGT            | F   | CcFULLike-B      | 145                               |
| ORB_106     | GAGAAAGAAGTAGGGCAGCA          | R   | CcFULLike-B      | 145                               |
| ORB_113     | CTGCTTACTGCACCTGAA            | F   | CcFULLike-A      | 74                                |
| ORB_114     | TCATCCCTCATCACTGCT            | R   | CcFULLike-A      | 74                                |
| ORB_119     | TCCCTTCAGCTGCTTCTCC           | F   | CcAP1 (CcMADS70) | 95                                |
| ORB_120     | AACCTTCCTCATGCCACC            | R   | CcAP1 (CcMADS70) | 95                                |

56

57 <sup>a</sup> Fragment when amplified from cDNA

58
